# Supplementary material for: Modulation of Innate Immunity by lignin-Carbohydrate, a Novel TLR4 Ligand, Results in Augmentation of Mucosal IgA and Systemic IgG Production
Source: MDPI journal article supplement (doi:10.3390/ijms19010064), 2017-12-26
Supplement: s1 [file s1]

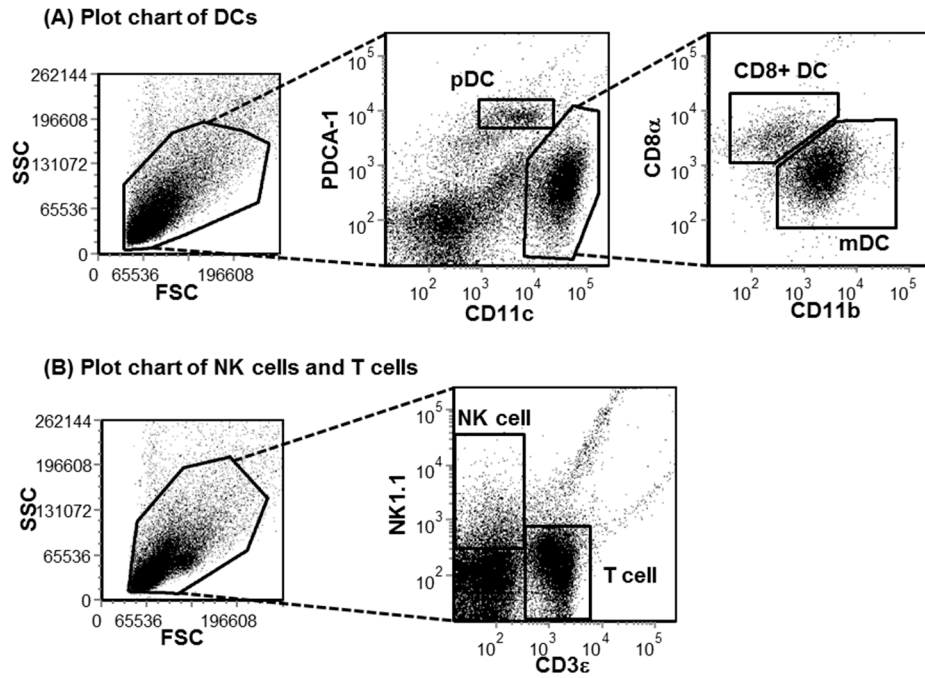

**Figure S1.** Representative FACS plot charts of DCs, NK cells and T cells.

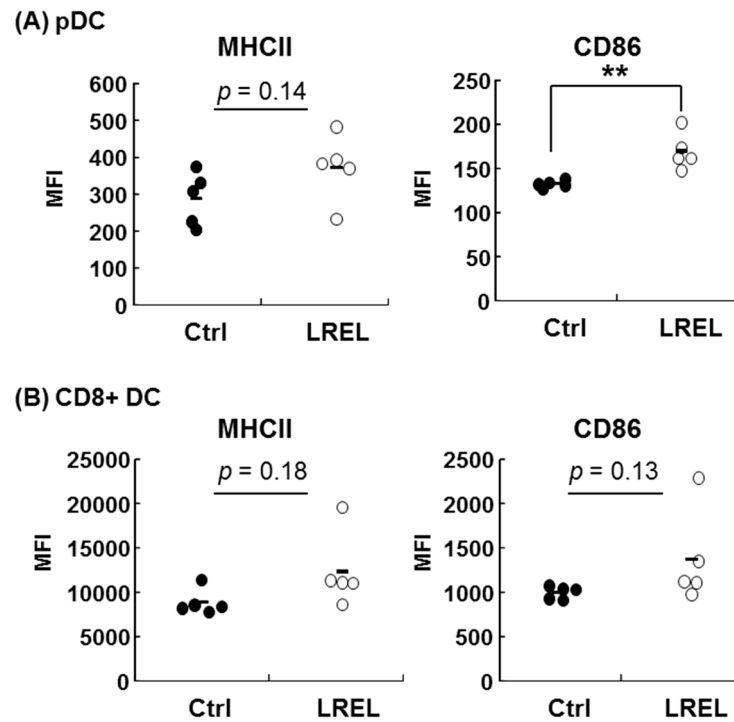

**Figure S2.** Comparison of MHCII and CD86 expression levels on SPN pDC and CD8+ DC. The expression levels of cell surface activation markers were analyzed by flow cytometry and evaluated as median fluorescence intensity (MFI). pDCs were defined as “CD11c<sup>int</sup> PDCA-1<sup>+</sup>” and CD8+ DCs were defined

as “CD11c<sup>+</sup> CD11b<sup>-</sup> CD8α<sup>+</sup> PDCA-1<sup>-</sup>” in the low density cells of splenocytes. Data are shown as mean ± SD (*n* = 5). \*\*, *p* < 0.01, compared to control (Student’s *t* test). Experimental conditions were same as Fig. 1.

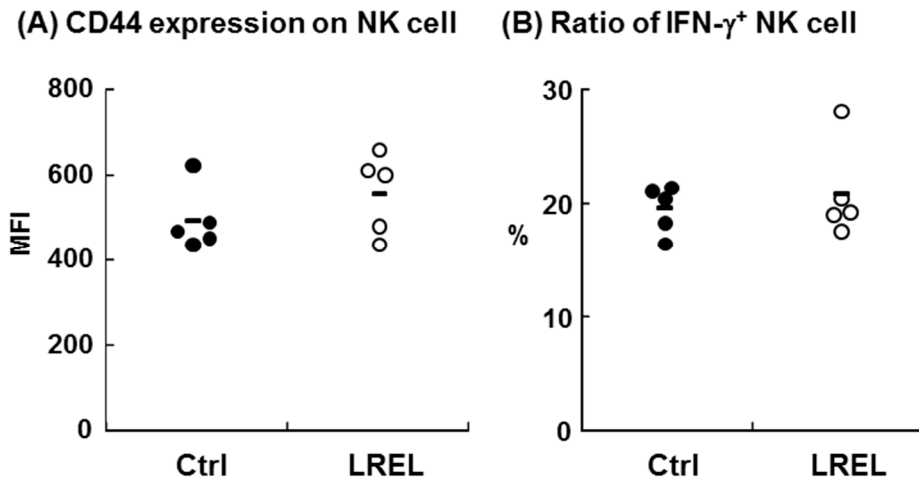

**Figure S3.** Comparison of NK cells activities in MLN. The activities of NK cells were evaluated by flow cytometry and NK cells were defined as “NK1.1<sup>+</sup> CD3ε<sup>-</sup>”. (A) CD44 expression level on MLN NK cells. The expression levels were evaluated as MFI. (B) Ratio of IFN-γ<sup>+</sup> NK cells in MLN. Experimental conditions were same as Fig. 3.

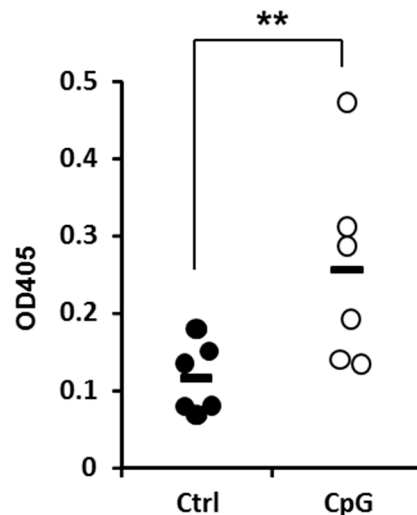

**Figure S4.** Examples for anti-OVA IgA measurement. In preliminary experiment, anti-OVA IgA concentration was measured in case of OVA administration, and found that there are no problems for the method of anti-OVA IgA measurement.
